# Supplementary material
Source: Springer Nature journal article supplement (https://www.springermedizin.de/resource/supplementary/12958_2013_1118_MOESM3_ESM.pdf/9566862)

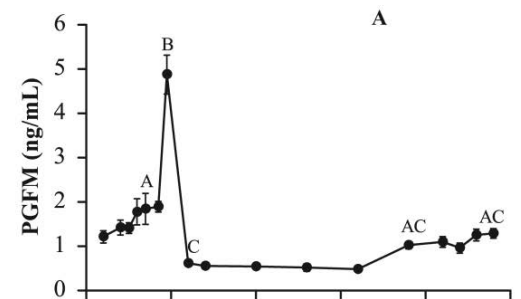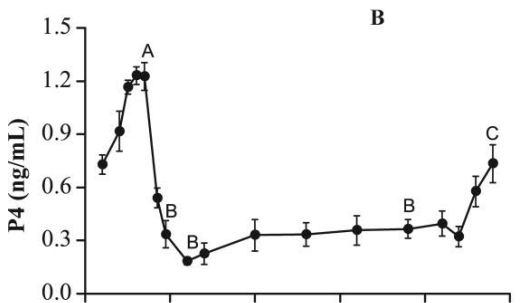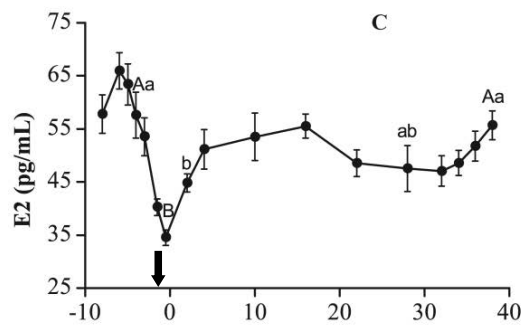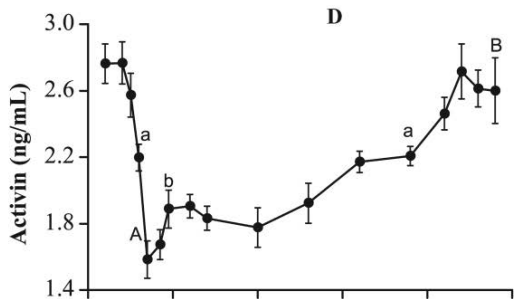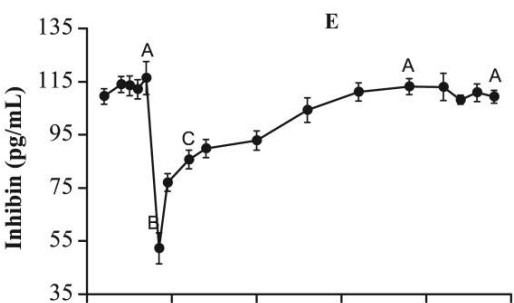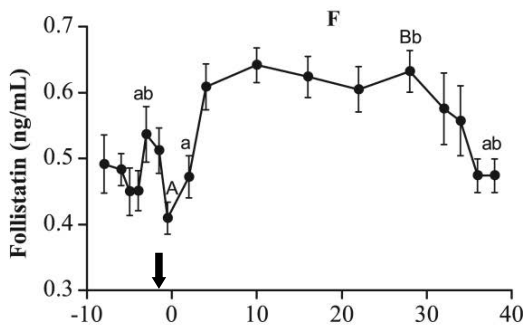

Time relative to ovulation (h)

Time relative to ovulation (h)

Supplement: MOESM3 [file 9566862]
